# Supplementary material for: Seroprevalence and Associated Risk Factors of Bovine Brucellosis in District Gujranwala, Punjab, Pakistan
Source: MDPI journal article supplement (doi:10.3390/ani11061744), 2021-06-11
Supplement: s1 [file s1]

**Supplementary Table S1: Results of Cohen's kappa test for RBPT and I-ELISA**

| Test used | ELISA +ve | ELISA -ve |
|-----------|-----------|-----------|
| RBPT +ve  | 27        | 03        |
| RBPT -ve  | 20        | 170       |

RBPT = Rose Bengal Plate Test; ELISA = Enzyme-Linked Immunosorbent Assay

Percent agreement = 89.54; Cohen's kappa coefficient = 0.64, Standard Error (SE) = 0.067, 95% CI = 0.510 – 0.773

**Supplementary Table S2: Differentiated test results for cows**

| Test used | ELISA +ve | ELISA -ve |
|-----------|-----------|-----------|
| RBPT +ve  | 11        | 02        |
| RBPT -ve  | 09        | 86        |

RBPT = Rose Bengal Plate Test; ELISA = Enzyme-Linked Immunosorbent Assay

**Supplementary Table S3: Differentiated test results for buffaloes**

| Test used | ELISA +ve | ELISA -ve |
|-----------|-----------|-----------|
| RBPT +ve  | 16        | 01        |
| RBPT -ve  | 11        | 84        |

RBPT = Rose Bengal Plate Test; ELISA = Enzyme-Linked Immunosorbent Assay
